1 All driven by energy demand? Integrative comparison of metabolism of *Enterococcus faecalis*  
2 wildtype and a glutamine synthase mutant

3

4 Seyed Babak Loghmani<sup>1</sup>, Eric Zitzow<sup>2</sup>, Gene Ching-Chiek Koh<sup>3#</sup>, Andreas Ulmer<sup>4</sup>, Nadine Veith<sup>1</sup>,  
5 Ruth Großholz<sup>1</sup>, Madlen Rossnagel<sup>2</sup>, Maren Loesch<sup>4</sup>, Ruedi Aebersold<sup>3</sup>, Bernd Kreikemeyer<sup>2</sup>,  
6 Tomas Fiedler<sup>2</sup>, Ursula Kummer<sup>1</sup>

7

8 <sup>1</sup>Department of Modelling of Biological Processes, BioQuant/COS Heidelberg, Heidelberg  
9 University, 69120 Heidelberg, Germany

10 <sup>2</sup>Institute for Medical Microbiology, Virology and Hygiene, Rostock University Medical Centre,  
11 Schillingallee 70, 18057 Rostock, Germany

12 <sup>3</sup>Department of Biology, Institute of Molecular Systems Biology, ETH Zurich, Zurich Switzerland

13 <sup>4</sup>Institute of Biochemical Engineering, University of Stuttgart, Stuttgart, Germany

14 #Current address: MRC Cancer Unit, University of Cambridge, Cambridge CB2 0XZ, UK

15

16 Abstract

17 Lactic acid bacteria (LAB) play a significant role in biotechnology, e.g. food industry, but also  
18 in human health. Many LAB genera have developed a multidrug resistance in the past few  
19 years, becoming a serious problem in controlling hospital germs all around the world.  
20 *Enterococcus faecalis* accounts for a large part of the human infections caused by LABs.  
21 Therefore, studying its adaptive metabolism under various environmental conditions is  
22 particularly important. In this study, we investigated the effect of glutamine auxotrophy  
23 ( $\Delta glnA$  mutant) on metabolic and proteomic adaptations of *E. faecalis* in response to a  
24 changing pH in its environment. Changing pH values are part of its natural environment in the  
25 human body, but also play a role in food industry. We compared the results to those of the  
26 wildtype. Our integrative method, using a genome-scale metabolic model, constrained by  
27 metabolic and proteomic data allows us to understand the bigger picture of adaptation  
28 strategies in this bacterium. The study showed that energy demand is the decisive factor in  
29 adapting to a new environmental pH. The energy demand of the mutant was higher at all  
30 conditions. It has been reported that  $\Delta glnA$  mutants of bacteria are energetically less effective.  
31 With the aid of our data and model we are able to explain this phenomenon as a consequence  
32 of a failure to regulate glutamine uptake and the costs for the import of glutamine and the  
33 export of ammonium. Methodologically, it became apparent that taking into account the non-

34 specificity of amino acid transporters is important for reproducing metabolic changes with  
35 genome-scale models since it affects energy balance.

36

37 Introduction

38

39 Lactic acid bacteria (LAB) are gram-positive microorganisms, fermenting hexose sugars to  
40 lactic acid as their primary product under many conditions. Among LABs there are both  
41 pathogenic as well as commensal species. In some cases, e.g. in the case of *Enterococcus*  
42 *faecalis* (*E. faecalis*) both commensal, as well as pathogenic behavior occurs<sup>1</sup>. As a part of the  
43 commensal flora, *E. faecalis* colonizes different tracts in the human body, especially the gut.  
44 Due to its pathogenic potential, *E. faecalis* frequently causes nosocomial infections, most  
45 commonly of the urinary tract, but also soft tissue or intra-abdominal infections, bacteremia  
46 or endocarditis<sup>2</sup>. An increasing proportion of *E. faecalis* strains isolated from such infection  
47 shows multidrug resistance against a wide range of antibiotics<sup>3,4</sup>. The treatment of infections  
48 caused by these multi-resistant *E. faecalis* strains can be remarkably hard and may cause  
49 severe problems in hospital environments<sup>5</sup>.

50 On the other hand, *E. faecalis* strains generally regarded as safe (GRAS) are used in food  
51 industry as a cheese starter culture<sup>6</sup> or as a probiotic<sup>7</sup>. The intended probiotic isolates,  
52 however, should undergo screening to ensure the absence of transferable virulence factors  
53 and antibiotic resistant genes<sup>8</sup>. Hence, *E. faecalis* encounters very different native  
54 environments ranging from different human body tissues to different kinds of food. This  
55 requires enormous flexibility of the metabolism of *E. faecalis* that in turn would be reflected  
56 by various metabolic phenotypes.

57

58 To gain a comprehensive understanding of metabolic phenotypes, the cell-wide and  
59 integrative analysis of metabolism is central. This is something that pure experimental  
60 research cannot deliver, and therefore, different computational approaches have been  
61 developed to study metabolic networks. For smaller networks and more detailed analysis,  
62 kinetic models based on ordinary differential equations (ODEs) are the best choice<sup>9</sup>. When  
63 integrating all reactions of the metabolic network and in the absence of detailed kinetic data,  
64 genome-scale metabolic models, as used below, are nowadays the preferred and most  
65 commonly used strategy. Genome-scale metabolic models are stoichiometric representations

66 of all annotated metabolic reactions in a given cell which allow the computation of flux  
67 distributions based on the knowledge of their localization, wiring and the biomass  
68 composition of the specific organism and/or cell type<sup>10</sup>. Optimal flux distributions are  
69 calculated according to an optimality criterion like biomass maximization<sup>11</sup>. This is an  
70 especially successful criterion for investigating microorganisms since these often follow  
71 relatively simple principles like optimizing growth. However, the typical outcome of such an  
72 optimization (flux balance analysis (FBA)) is not a unique solution and the huge size of the  
73 solution space renders interpretation of the results difficult and error-prone<sup>12</sup>. By adding  
74 constraints, e.g. through experimentally measured medium composition, input and output  
75 fluxes of metabolites<sup>13</sup>, transcriptome<sup>14</sup>, as well as proteome data<sup>15</sup> the solution space can  
76 effectively be decreased and the predictive power of the models increased<sup>15,16</sup>.

77

78 In this study, we analyzed the metabolic and proteomic profile of a knock-out mutant of  
79 glutamine synthetase ( $\Delta glnA$ ) of the multiresistant *E. faecalis* V583 strain during a pH shift  
80 experiment. Glutamine Synthetase (GlnA) is a vital protein as it is the main enzyme in the  
81 assimilation of ammonia and has an overall control over the nitrogen metabolism<sup>17</sup>. We  
82 designed an experiment to investigate the effect of glutamine auxotrophy on the metabolic  
83 behavior of the organism under two pH conditions by comparing the results to those of the  
84 wildtype<sup>18</sup>. For this purpose, a previously published genome-scale metabolic model<sup>19</sup> of the  
85 wildtype was adjusted to represent the  $\Delta glnA$  mutant. Experimental data of the  $\Delta glnA$  mutant  
86 was then used to constrain the solution space of the model. The results were compared with  
87 a likewise constrained wildtype model, thereby providing an integrative view on the metabolic  
88 adjustments that the organism has to perform to react to the imposed glutamine auxotrophy  
89 during environmental pH changes.

90

91 **Materials and Methods**

92

93 **Experimental**

94 **Bacterial strains and culture conditions**

95 *Enterococcus faecalis* V583  $\Delta glnA$ <sup>19</sup> mutant was grown in batch cultures at 37 °C in a  
96 chemically defined medium for lactic acid bacteria (CDM-LAB<sup>13</sup>, pH 7.5 and 6.5). The CDM-LAB  
97 medium contained the following per liter: 1 g K<sub>2</sub>HPO<sub>4</sub>, 5 g KH<sub>2</sub>PO<sub>4</sub>, NaHCO<sub>3</sub>, 0.6 g ammonium

98 citrate, 1 g acetate, 0.25 g tyrosine, 0.24 g alanine, 0.5 g arginine, 0.42 g aspartic acid, 0.13 g  
99 cysteine, 0.5 g glutamic acid, 0.15 g histidine, 0.21 g isoleucine, 0.475 g leucine, 0.44 g lysine,  
100 0.275 g phenylalanine, 0.675 g proline, 0.34 g serine, 0.225 g threonine, 0.05 g tryptophan,  
101 0.325 g valine, 0.175 g glycine, 0.125 g methionine, 0.1 g asparagine, 0.2 g glutamine, 10 g  
102 glucose, 0.5 g L-ascorbic acid, 35 mg adenine sulfate, 27 mg guanine, 22 mg uracil, 50 mg  
103 cystine, 50 mg xanthine, 2.5 mg D-biotin, 1 mg vitamin B12, 1 mg riboflavin, 5 mg  
104 pyridoxamine-HCl, 10 mg p-aminobenzoic acid, 1 mg pantothenate, 5 mg inosine, 1 mg  
105 nicotinic acid, 5 mg orotic acid, 2 mg pyridoxine, 1 mg thiamine, 2.5 mg lipoic acid, 5 mg  
106 thymidine, 200 mg MgCl<sub>2</sub>, 50 mg CaCl<sub>2</sub>, 16 mg MnCl<sub>2</sub>, 3 mg FeCl<sub>3</sub>, 5 mg FeCl<sub>2</sub>, 5 mg ZnSO<sub>4</sub>, 2.5  
107 mg CoSO<sub>4</sub>, 2.5 mg CuSO<sub>4</sub>, and 2.5 mg (NH<sub>4</sub>)<sub>6</sub>Mo<sub>7</sub>O<sub>24</sub>.

108

### 109 **pH shift experiments in chemostat cultures**

110 The pH shift experiments were carried out as previously described<sup>18</sup>. In short, *E. faecalis* V583  
111  $\Delta$ *glnA* was grown in glucose-limited chemostat cultures in Biostat B Plus benchtop bioreactors  
112 (Sartorius) in 750 ml CDM-LAB with a dilution rate of 0.15/h at 37 °C and gassing with 0.05  
113 L/min nitrogen and stirring with 250 rpm. The pH was kept at the desired level by titrating  
114 with 2 M KOH. Initially, the pH was kept constant at 7.5 until a steady state was reached.  
115 Steady state was assumed when no glucose was detectable in the culture supernatant  
116 anymore and dry mass and optical density (600 nm) were constant on two consecutive days.  
117 For the pH shift, the pH control was switched off until the desired pH (6.5) value was reached.  
118 The cultivation was continued until the steady-state was reached again. Samples were taken  
119 at steady state pH 7.5 and at several time points during and after the pH shift as indicated in  
120 Figure 1. Per sampling point, samples for determination of dry mass, extracellular metabolites  
121 and proteomic analysis were taken as previously described<sup>18</sup>.

122

### 123 **Chemostat cultures for determination of ATP<sub>maintenance</sub>**

124 For determination of ATP<sub>maintenance</sub> (ATP<sub>m</sub>), *Enterococcus faecalis* V583  $\Delta$ *glnA* was grown in  
125 glucose-limited chemostats as described above (except for pH shift) at two different dilution  
126 rates, 0.15 h<sup>-1</sup> and 0.05 h<sup>-1</sup>, with three biological replicates per dilution rate. At steady-state  
127 samples were taken and processed as described above.

128

### 129 **Quantification of extracellular metabolites**

130 For samples from pH shift experiments, quantification of amino acids in media and culture  
131 supernatants was done by Frank Gutjahr Chromotgraphie (Balingen, Germany) and  
132 quantification of lactate, formate, acetate, glucose, acetoin, 2,3-butanediol, ascorbate,  
133 citrate, pyruvate and ethanol were done by Metabolomics Discoveries GmbH (Potsdam,  
134 Germany). For quantification of amino acids, glucose, and fermentation products in CDM-LAB  
135 and culture supernatants of samples from ATP<sub>maintanance</sub> experiments, the following two  
136 methods were used:

137 Method 1: an Agilent 1260 Infinity II HPLC system was used. The system was controlled by  
138 OpenLAB CDS Workstation software. For the amino acids analysis, sample supernatants were  
139 filtered through a 0.22 µm syringe filter into a HPLC sample vial. Amino acids were derivatized,  
140 separated on a reversed-phase column (Agilent Poroshell 120 EC-C18 4.6x100mm, 2.7µm),  
141 detected with a diode array detector (DAD G7117A) and quantified following manufacturer's  
142 guidelines (AdvanceBio Amino Acid Analysis, © Agilent Technologies, Inc. 2018). Standards  
143 ranging from 5 µM to 30 mM were used for the quantification of aspartate, glutamate,  
144 asparagine, serine, glutamine, histidine, glycine, threonine, arginine, alanine, tyrosine, valine,  
145 methionine, tryptophan, phenylalanine, isoleucine, leucine, lysine and proline.

146 For analysis of organic compounds, samples were prepared as follows: 100 µl 35 % perchloric  
147 acid were added to 1 ml sample, mixed and placed on melting ice for 10 minutes.  
148 Subsequently, 55 µl potassium hydroxide solution (7 M) were added and the sample was  
149 centrifuged for 2 min at 20,000 g. The supernatant was filtered through a 0.22 µm syringe  
150 filter into a HPLC sample vial. Separation of sugars and fermentation products in the sample  
151 was performed by using an Agilent Hi-Plex H column (4.6x250 mm, 8 µm) with a working  
152 temperature of 65 °C using 10 mM H<sub>2</sub>SO<sub>4</sub> as a mobile phase with a flow rate of 0.4 ml/min.  
153 For detection, a refraction index detector (RID) with a working temperature of 35 °C and a  
154 diode array detector (DAD) with a wavelength of 210nm/4nm with a reference wavelength of  
155 360nm/100nm were used. Standards ranging from 50 µM to 150 mM were used for the  
156 quantification of glucose, ethanol, citrate, lactate, pyruvate, formate and acetate.

157 Method 2: Sugars and organic acids in the supernatant were measured with an isocratic  
158 Agilent 1200 series HPLC system equipped with a Phenomenex guard carbo-H column (4 by  
159 3.0 mm) and a Rezex ROA organic acid H (8%) column (300 by 7.8 mm, 8 µm; Phenomenex)  
160 maintained at 50°C. Analytes were separated and detected using 5 mM H<sub>2</sub>SO<sub>4</sub> with a constant  
161 flow rate of 0.4 mL min<sup>-1</sup>. Prior to analysis samples were pretreated for precipitation of

162 abundant phosphate by addition of 4 M NH<sub>3</sub> and 1.2 M MgSO<sub>4</sub> solution followed by  
163 incubation with 0.1 M H<sub>2</sub>SO<sub>4</sub>. Absolute concentrations were obtained by standard-based  
164 external calibration and normalization with L-rhamnose as internal standard.

165

#### 166 **Quantification of protein abundances**

167 All the steps in quantification of protein abundances were exactly carried out as previously  
168 described in Großholz *et al*<sup>18</sup>.

169

170 Computational

#### 171 **Determination of non-growth associated ATP<sub>maintenance</sub>**

172 The determination of non-growth associated ATP (ATP<sub>m</sub>) was performed as described in  
173 Teusink *et. al*<sup>20</sup>. Thus, the measured flux value for the carbohydrates, organic acids and amino  
174 acids were integrated in the genome-scale model as constraints. The biomass reaction was  
175 fixed at the respective growth rate (dilution rate) and the flux of the ATP<sub>m</sub> reaction was  
176 maximized as the objective function. The obtained values were used to fit a linear function,  
177 for which the  $y$ -intercept determines the required energy for the organism at zero growth  
178 rate. This value is then applied to the model as the lower bound of the ATP<sub>m</sub> reaction.

179

#### 180 **Integration of constraints to the genome-scale model**

181 The integration of constraints to the genome-scale model were done as indicated in Großholz  
182 *et al*<sup>18</sup>. To integrate the metabolic data a tolerance level of 40% was applied to the measured  
183 flux rates to account for measurement errors. The obtained values were applied to the upper  
184 (+ 20%) and lower (-20%) bounds of the respective exchange reactions at both conditions.  
185 Regarding the proteome data, the reaction with no experimental evidence at the proteome  
186 level at pH 7.5 were deactivated. To represent the significant fold changes of proteins in  
187 response to pH shift, the log<sub>2</sub> change of protein abundances were multiplied by 40%  
188 (tolerance level) and then applied to the maximum and minimum value of respective  
189 reactions, obtained by flux variability analysis (FVA)<sup>21</sup> at pH 7.5.

190

#### 191 **Results**

192 In order to follow the metabolic adjustments to pH changes in the  $\Delta$ *glnA* mutant of *E. faecalis*  
193 V583 a chemostat set-up was used and a pH shift from pH 7.5 to 6.5 was applied. The

194 respective pH profile can be seen in Fig. 1. At all indicated time-points, samples were taken  
195 and subjected to biomass, metabolite and proteome measurements. The results are  
196 compared with earlier measurements of the corresponding *E. faecalis* wildtype strain under  
197 the same conditions<sup>18</sup>.

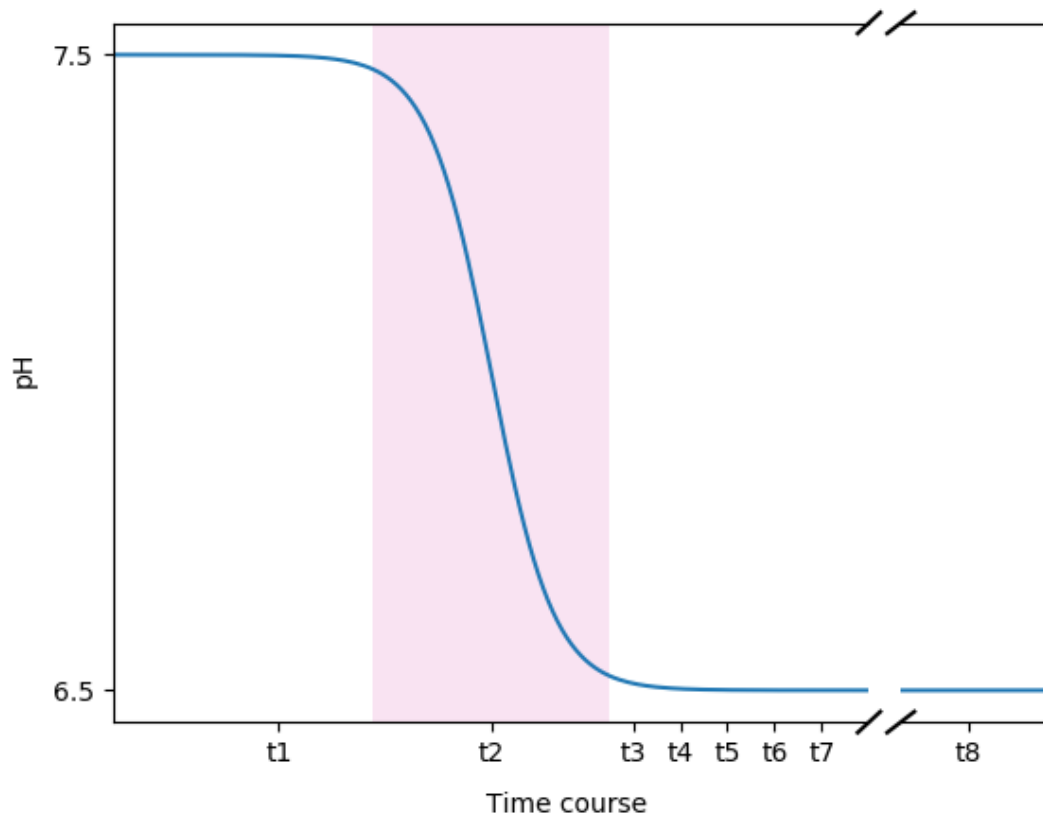

198  
199 *Figure 1. Time course of the pH shift experiment. Samples were taken at t1 (steady-state at pH*  
200 *7.5), t2 (the transition state (pink background) during the pH shift), t3, t4, t5, t6 and t7 which*  
201 *indicate data points at pH 6.5 at 80, 100, 120, 180 and 240 minutes after the start of the pH*  
202 *shift. Finally, samples were taken at t8, the steady-state at pH 6.5, 21 h after the start of the*  
203 *experiment. The distance between the data points does not represent the actual time*  
204 *difference in the experiment. Also, the break between t7 and t8 shows the shortened x axis*  
205 *between the two data points.*

206

207 Effect of pH on the growth rate

208

209 The biomass production of *E. faecalis*  $\Delta$ *glnA* decreased from 1.54 to 1.15 g/l when the pH was  
210 shifted from 7.5 to 6.5 (Fig. 2). The trend of decreasing the biomass production at lower pH  
211 values is similar to the wildtype, as the biomass production in both genotypes decreased by

212 approximately 25% in response to pH shift. However, the biomass production of the wildtype  
213 at any given pH value is larger than that of the mutant, suggesting an important role of the  
214 glutamine synthetase reaction for the growth of the organism.

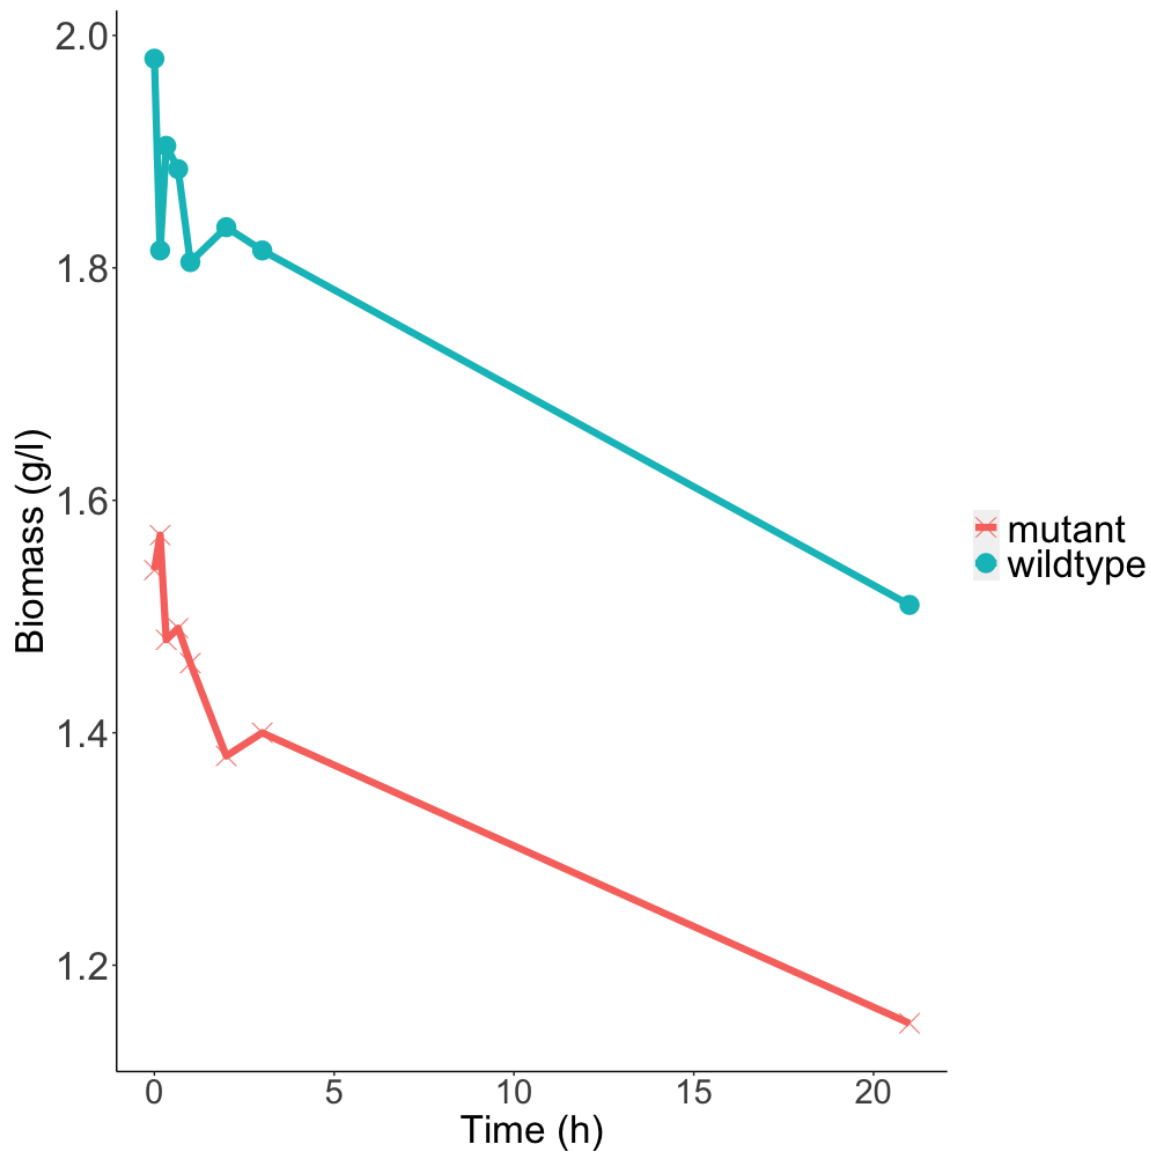

215  
216 *Figure 2. Development of the biomass production over the course of 21 hours during the pH*  
217 *shift experiment. The red line shows the biomass values of the *E. faecalis*  $\Delta$ *glnA* mutant, while*  
218 *the blue line shows the one of the wildtype. Each data point represents the mean of two*  
219 *biological replicates.*

220

221 The effect of pH on metabolite uptake and production

222

223 To discover the effect of a pH shift on the metabolic behavior of *E. faecalis*  $\Delta$ *glnA*, the  
224 concentration of the extracellular carbon source (glucose), organic acids as well as amino acids



225 was determined in the samples of the chemostat experiment and the respective uptake or  
226 production rates were calculated accordingly (Fig. 3). The measured profile of the carbon  
227 source and organic acids consists of the uptake rate of glucose, as the primary energy source  
228 for the organism, and the fermentation profile containing lactate, acetate, ethanol and  
229 formate, reflecting the state of the energy metabolism at each pH value. Similar to the  
230 wildtype, the glucose uptake rate increased in response to the drop in pH, indicating a higher  
231 energy demand in a more acidic environment. This is mostly caused by the need to pump  
232 protons out of the cell at the expense of ATP<sup>18</sup>. Moreover, and also similar to the wildtype,  
233 the fermentation pattern changed from mixed acid fermentation to homolactic fermentation,  
234 as homolactic fermentation is energetically more favorable. Despite the qualitative similarity  
235 of the pH response to that of the wildtype, quantitatively, the uptake rate of glucose in the  
236 mutant showed a stronger increase compared to the wildtype. This is translated to a higher  
237 lactate production, suggesting a higher energy demand in response to pH shift in the *ΔglnA*  
238 mutant. Also, the extent of shift to homolactic fermentation is stronger in the mutant. So, in  
239 summary, these results indicate a higher energy demand in the *ΔglnA* mutant of *E. faecalis*  
240 compared to the wildtype at all pH values.

241

242 This increased energy demand is also suggested when comparing the uptake and production  
243 rates of amino acids between *E. faecalis ΔglnA* and the wildtype (Fig. 4). Overall, the amino  
244 acids uptake rate decreased in response to pH shift with the exception of arginine, glutamine  
245 and serine. Since less biomass is produced and more ATP is needed for proton export, less  
246 protein synthesis should occur. At the same time, amino acid uptake is also energy consuming  
247 since it is accompanied by either direct ATP consumption or additional proton import.  
248 Therefore, it is interesting to look at the reason for an increased uptake rate under these  
249 conditions. The uptake rate of arginine and serine, as well as the production rate of ornithine  
250 both increased in the wildtype and the mutant after the pH shift. It has been reported that  
251 the catabolism of arginine via arginine deaminase is used by a variety of lactic acid bacteria in  
252 response to a more acidic environment<sup>22</sup>. Initially, it had been believed that there is a  
253 beneficial buffering by ammonia. But when calculating the actual stoichiometries, we  
254 previously showed that this is not the case at the respective pH<sup>13</sup>. However, arginine is readily  
255 metabolized to gain ATP which can be used to pump protons to the extracellular environment  
256 under a more acidic condition. Therefore, it can be suggested that under more energy-

257 demanding conditions (mutant versus wildtype, and pH 6.5 versus 7.5 (in both genotypes)), a  
258 higher uptake rate of arginine may help cells to boost energy production. Serine uptake was  
259 also increased after the pH shift in the *ΔglnA* mutant, as serine can as well be used for ATP  
260 production via degradation to ammonia and pyruvate and fermenting pyruvate to acetate.  
261 Additionally, the uptake rate of glutamine and the production rate of ammonia were  
262 considerably higher in the mutant compared to the wildtype at both pH levels. The latter is a  
263 curious observation, since the export of such amounts of ammonia points to excess nitrogen  
264 from glutamine. The glutamine auxotrophy of the mutant might explain the larger margin  
265 between the two pH values, as the higher uptake rate ensures that the growth is less affected  
266 by the auxotrophy. More importantly, however, it has been reported that in *Streptococcus*  
267 *pneumoniae*<sup>23</sup> the transcription factor GlnR (which controls the production and transport of  
268 glutamine) is dependent on the intact gene for GlnA to successfully function. The  
269 overproduction of ammonia suggests that the regulatory effect of GlnR is also disrupted in *E.*  
270 *faecalis ΔglnA*, resulting in the upregulation of the glutamine ABC transporter (GLNabc) and  
271 an unnecessarily high glutamine uptake rate accordingly. This also accounts for the small  
272 glutamate excretion in the mutant at pH 6.5, since massive amounts of glutamine will drive  
273 the glutamine deaminase to produce both glutamate and ammonium. The glutamate  
274 excretion was however not observed in a previous study<sup>19</sup>.

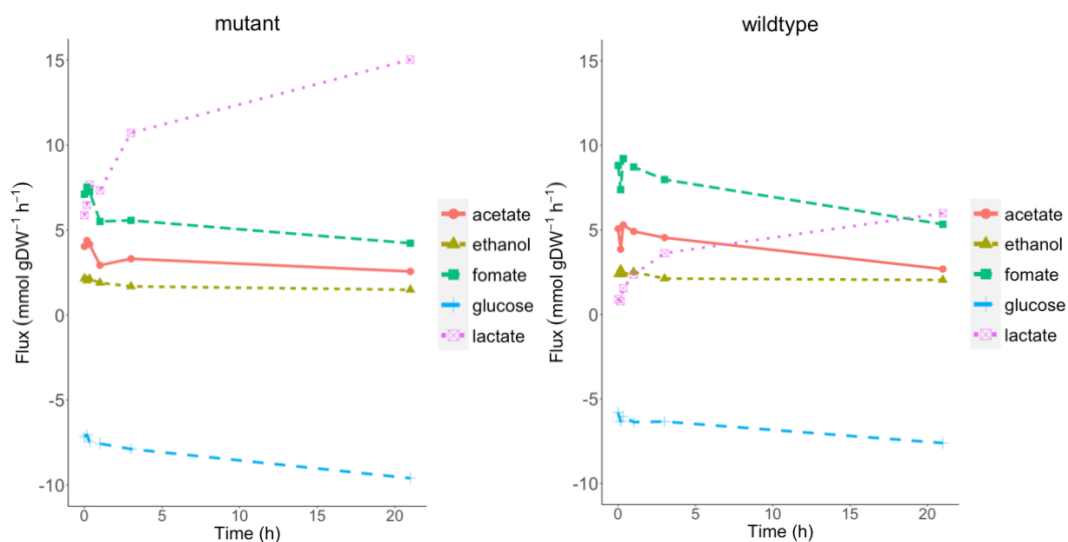

275  
276 *Figure 3. The uptake and production rate of glucose and fermentation products during the pH*  
277 *shift experiment. The left panel shows the data from the mutant, and the right panel shows*  
278 *the data from the wildtype. Each data point represents the mean of two biological replicates.*  
279

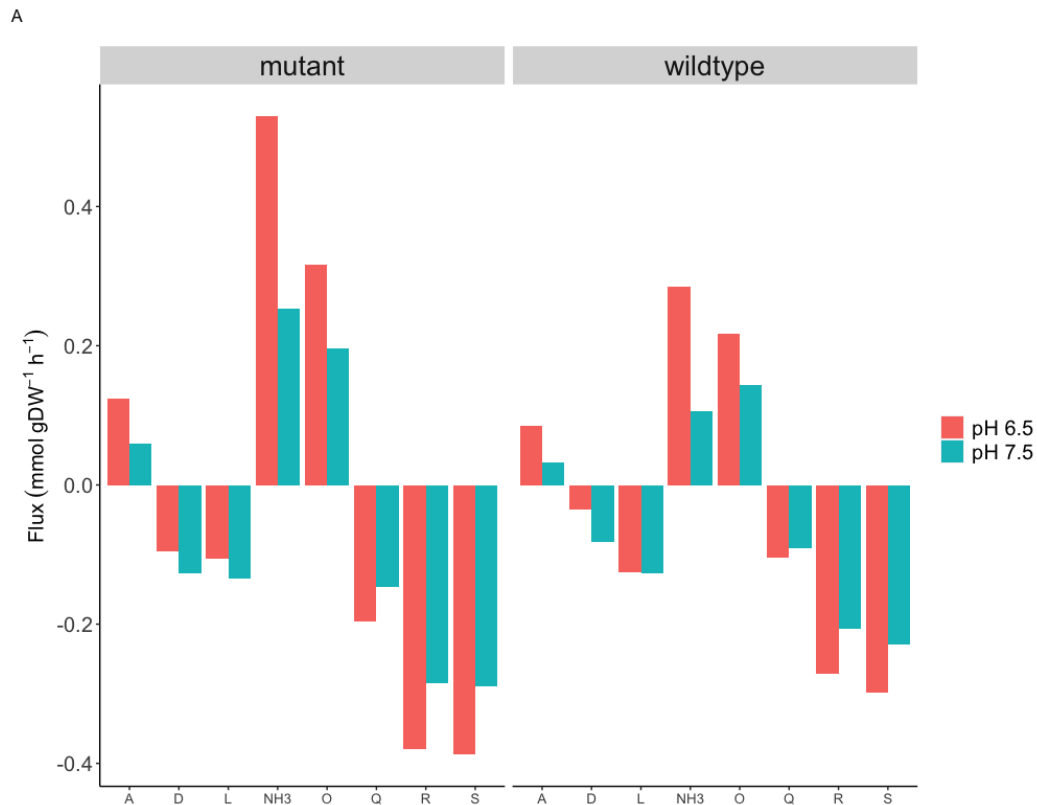

280

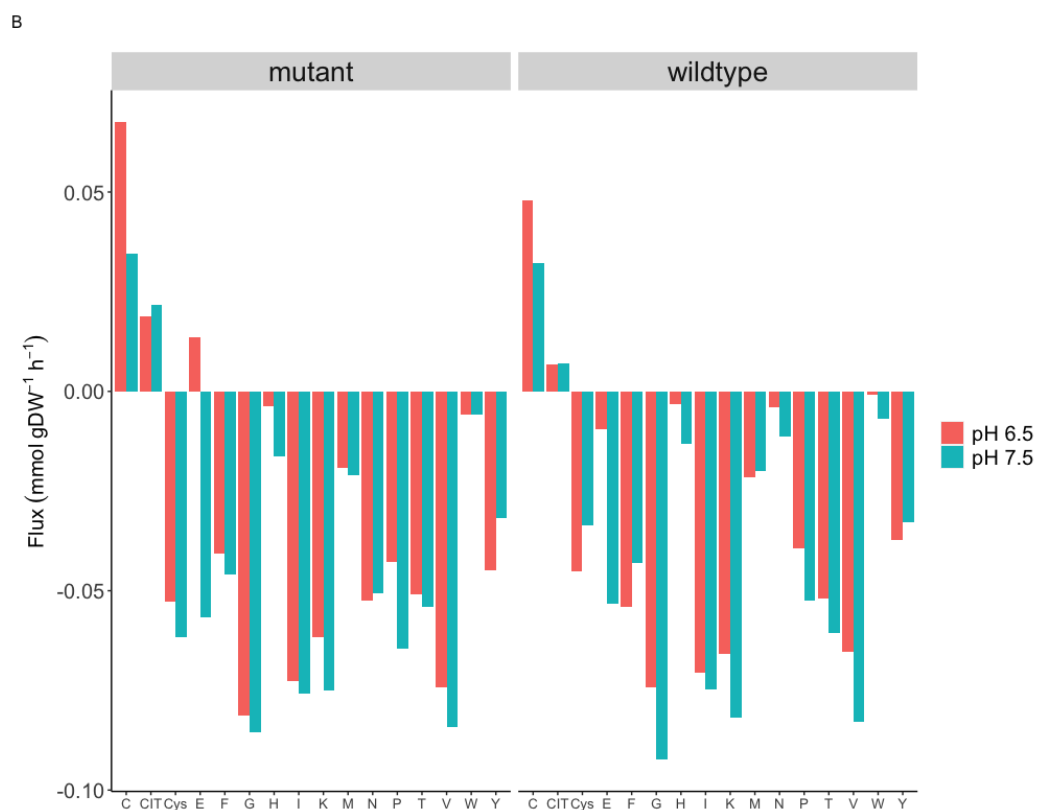

281

282 *Figure 4. The uptake and production of the amino acids in the wildtype and the  $\Delta$ glnA mutant*  
283 *at pH 7.5 and 6.5 (t1 and t8, respectively). Panel A shows the uptake/production rate of amino*  
284 *acids with high flux value (larger than 0.1 mmol/g<sup>-1</sup><sub>DW</sub>h<sup>-1</sup>) and panel B shows the*  
285 *uptake/production rate of amino acids with low flux value (smaller than 0. mmol/g<sup>-1</sup><sub>DW</sub>h<sup>-1</sup>)*

286 Significant fold changes on protein level during the pH shift

287

288 To observe the effect of the pH shift on the protein expression in *E. faecalis*  $\Delta$ *glnA*, the  
289 expression rate of all detected proteins was quantified throughout the pH shift experiment  
290 and the respective significant fold changes were calculated at different time points compared  
291 to time point 1 (t1). The complete set of significantly changed protein expressions is shown in  
292 the supplement (supplementary table 1). While there was no significant fold change at t2, the  
293 highest number of fold changes was observed at t3, 20 minutes after the start of the pH shift,  
294 with more than 40 proteins (out of 1681 detected ORFs) being affected. Among all affected  
295 proteins eleven are involved in membrane and cell wall production, and two proteins assigned  
296 to reactions involved in peptidoglycan biosynthesis. This suggests that restructuring of the  
297 membrane and cell envelope occurs early in response to a change in environmental pH -  
298 similar to what has been observed for the wildtype<sup>18</sup>. A smaller number of proteins was  
299 affected by the pH shift between t4 (1 hour after start of the pH shift) and t7 (4 hours after  
300 start of the pH shift), all of which were downregulated. At t8, 21 hours after the pH shift, the  
301 number of significant fold changes amounted to 40, with the majority of the proteins being  
302 downregulated. A large number of these is involved in nucleotide biosynthesis (Table 1).  
303 Considering the fact that *de novo* biosynthesis of nucleotides is an energy demanding process  
304 for the organism, the down regulation of the respective pathways is in line with the higher  
305 energy demand under the more acidic condition.

306

307

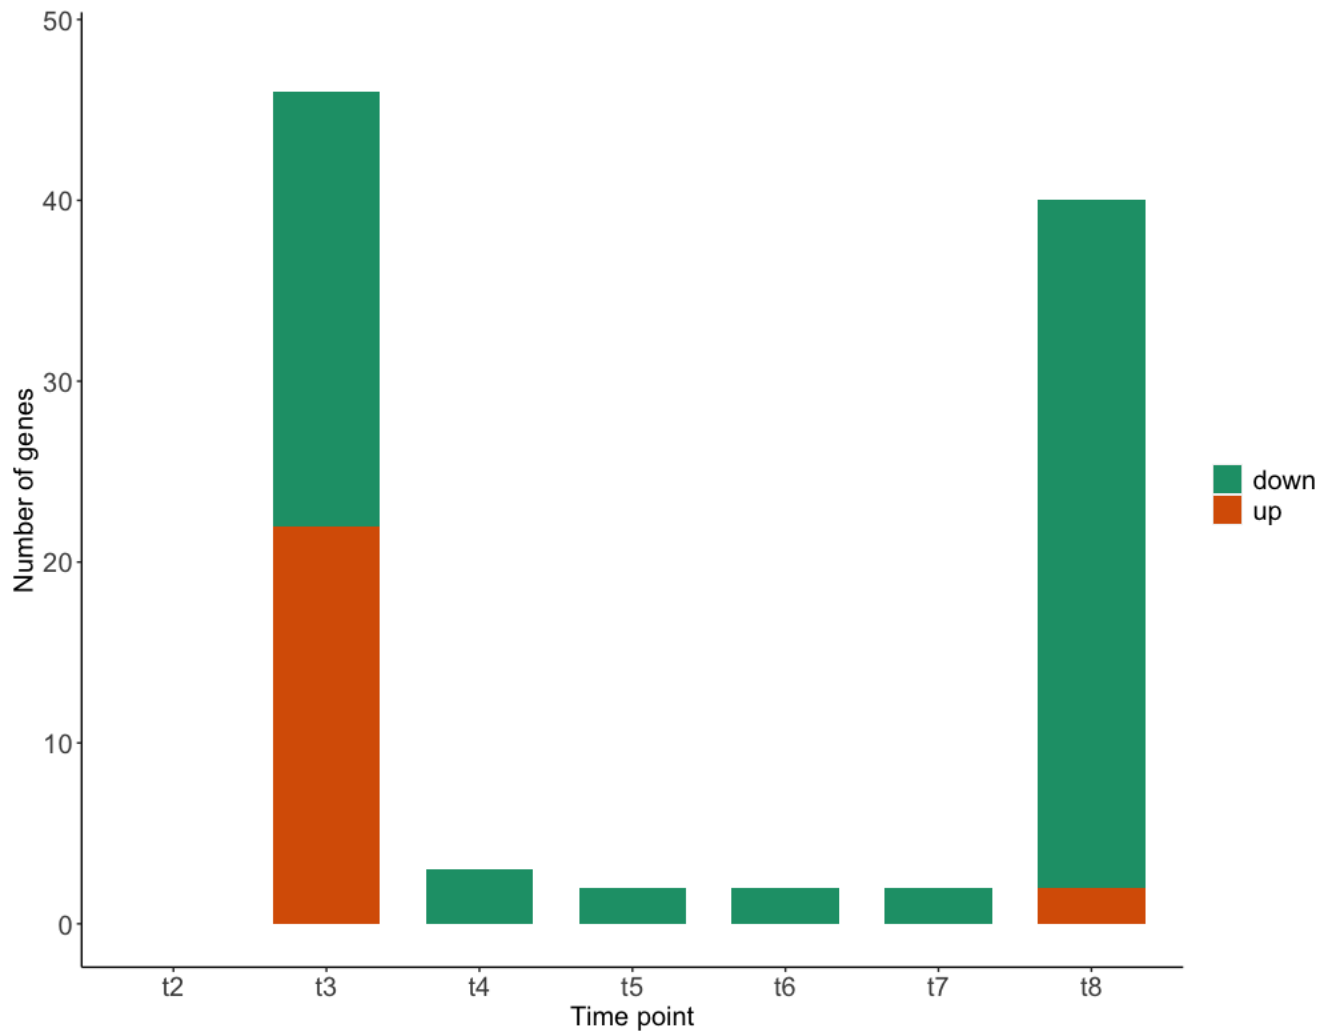

308

309 *Figure 5. The significant change in protein abundances in the  $\Delta$ glnA mutant during the pH shift*  
310 *experiment at different time points.*

311

312 To find out the differences between the wildtype and the mutant at the proteome level in  
313 response to pH shift, the significant fold changes were compared. Except for t8, the number  
314 of significant fold changes in the wildtype was considerably higher than that in the mutant.

315 As already mentioned, at early time-points, both the mutant and the wildtype showed fold  
316 changes in enzymes that are involved in membrane and cell wall production. However, at  
317 these early time-points after pH shift the wildtype also displayed an upregulation of glycolytic  
318 enzymes compared to the mutant. The lack of increased expression in glycolytic enzymes in  
319 the mutant might be explained by the previously introduced higher energy demand. Since  
320 glycolysis is responsible for the major energy production in *E. faecalis*, it is plausible that the  
321 expression of those enzymes was already at a higher level in the mutant. The downregulation

322 of enzymes involved in nucleotide metabolism after the pH-shift is again similar between  
323 wildtype and mutant.

324

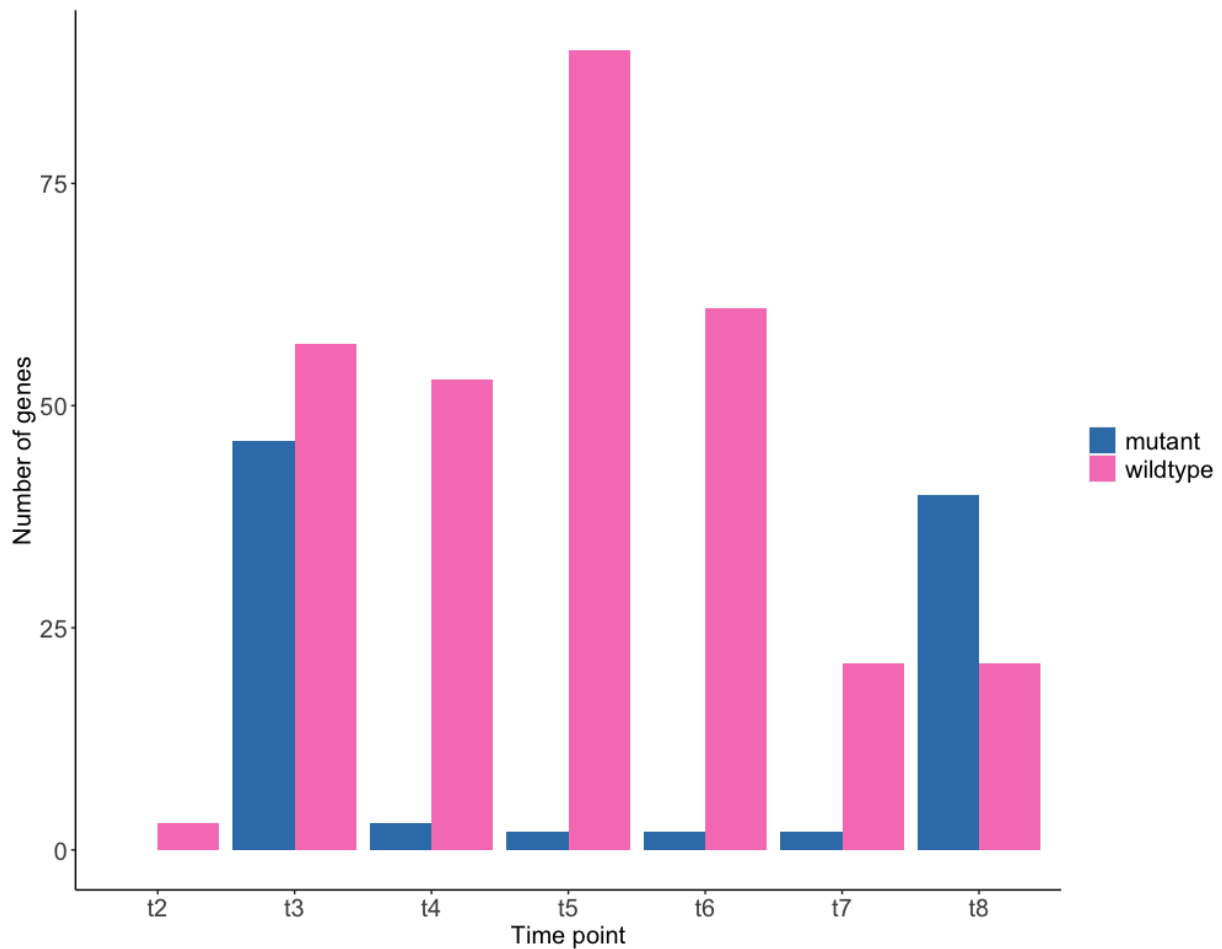

325

326 *Figure 6. The number of significant changes in protein abundances during the pH shift*  
327 *experiment in the wildtype and the  $\Delta$ glnA mutant.*

328 *Table 1. The number of significant changes in protein abundances and the prominent*  
329 *respective subsystems at t8 ( $\Delta$ glnA mutant)*

| Subsystems              | Number of affected genes |
|-------------------------|--------------------------|
| Amino acid metabolism   | 3                        |
| Carbohydrate metabolism | 7                        |
| Nucleotide metabolism   | 22                       |
| Transport               | 6                        |

330

331 Computational

332 In order to study the metabolic behavior of *E. faecalis*  $\Delta$ glnA more comprehensively and on a  
333 cell-wide scale, genome-scale modelling in combination with constraint-based modelling was

334 applied. For that matter, the previously published genome-scale metabolic network of *E.*  
335 *faecalis*<sup>19</sup> was used to simulate the pH shift experiment by the integration of metabolic and  
336 proteomic data from the *E. faecalis*  $\Delta glnA$ . To integrate the experimental data into the  
337 genome-scale model, the framework from our previous<sup>18</sup> work was applied. To represent the  
338 *glnA* knock-out in the model, the reaction flux of glutamine synthetase was set to zero. The  
339 complete model is available at biomodels.

340

341 Determination of the non-growth associated ATP value of *E. faecalis*  $\Delta glnA$

342

343 In order to prepare the genome-scale model of *E. faecalis*  $\Delta glnA$  for the integration of the  
344 above described data and the analysis via FBA, we determined the non-growth associated  
345 energy demand (ATPm) which is an important feature for performing FBAs. The non-growth  
346 associated energy demand reflects the amount of energy required to sustain life at zero  
347 growth. Thus, the definition of this parameter is an important aspect for genome-scale  
348 modelling as it can strongly affect the flux distributions in the metabolic network.

349 For this purpose, *E. faecalis*  $\Delta glnA$  was grown in chemostat cultures at two different dilution  
350 rates (0.05, 0.15 h<sup>-1</sup>). After reaching the steady-state, samples were taken from the chemostat  
351 cultures and the metabolite composition in the supernatant was experimentally determined  
352 to calculate the uptake/production rate of extracellular metabolites (Table 2). The uptake and  
353 production rates of glucose, organic acids, and amino acids were then integrated into the  
354 model as reaction constraints, defined as bounds on the respective exchange reactions. To  
355 calculate parameters for the ATPm reaction, for each dilution rate, the biomass production  
356 reaction was fixed at the maximal growth rate that is equal to the value of the dilution rate,  
357 and the flux through the ATPm reaction was maximized as the new objective function. The  
358 obtained maximal objective function value, namely the maximal flux through the ATPm  
359 reaction at different dilution rates is plotted against the respective dilution rate and a linear  
360 function was fitted to those values. The non-growth associated energy reflects the amount of  
361 energy that microbes require to survive at zero growth and is derived from the y-intercept of  
362 the linear function. This value represents the maintenance energy and was used as the lower  
363 bound of the ATPm reaction in the model.

364 This constraint ensures that the minimum required amount of energy for non-growth  
365 associated purposes is produced by the model and is not channeled into biomass production

366 and thus into growth. As a result, the calculated value of ATPm of the *E. faecalis*  $\Delta$ *glnA* was  
367 5.977 and 6.224 mmol/g<sup>-1</sup><sub>DWh</sub><sup>-1</sup> at pH 7.5 and 6.5, respectively. When integrated into the  
368 model, however, the maximal biomass production is too high compared to experimental data.  
369 In fact, the level at which the model produced the fermentation products resulted in a very  
370 high ATP production, so at this value of ATPm, the ATP is redirected into biomass production.  
371 Hence, the constraints of this reaction had to be set on a higher value under both pH  
372 conditions. Several reasons allow for such adjustment without violating the modeling rules.  
373 First, the ATPm is an estimated value by taking the measured value of around 30 metabolites  
374 into account. Therefore, the estimation is very error prone, as the measurement error of all  
375 the metabolites accumulate and impact the optimization process. For instance, the glucose  
376 uptake rate at pH 7.5 at the dilution rate of 0.15 was 6.32 mmol/g<sup>-1</sup><sub>DWh</sub><sup>-1</sup> in the data set used  
377 for ATPm estimation, and 7.17 mmol/g<sup>-1</sup><sub>DWh</sub><sup>-1</sup> in another previously measured data set shown  
378 in Figure 3. This difference of 0.85 mmol/g<sup>-1</sup><sub>DWh</sub><sup>-1</sup> results in approximately 2 mmol/g<sup>-1</sup><sub>DWh</sub><sup>-1</sup>  
379 difference at the optimized ATPm value at this particular condition. Second, the ATPm value  
380 in essence is meant to ensure that the model is not reaching the optimal growth by  
381 overlooking the non-growth associated energy. In this sense, deviation from the estimated  
382 value to a higher value does not violate the underlying assumption, while deviation to a lower  
383 value would require more solid evidence. Here, both calculated values for the ATPm reaction  
384 seem to be too low and had to be increased. If we consider lactate production as an indicator  
385 of the energetic state of the cell, the fact that the lactate production in the mutant is several  
386 times higher than in the wildtype suggests a much higher ATPm value for the mutant  
387 compared to the wildtype (the ATPm values in the wildtype were calculated to be 3.9 mmol/g<sup>-1</sup><sub>DWh</sub><sup>-1</sup>  
388 at pH 7.5 and 8.4 mmol/g<sup>-1</sup><sub>DWh</sub><sup>-1</sup> at pH 6.5<sup>18</sup>). Therefore, the ATPm values in the mutant  
389 were increased to 9.7 mmol/g<sup>-1</sup><sub>DWh</sub><sup>-1</sup> and 10.6 mmol/g<sup>-1</sup><sub>DWh</sub><sup>-1</sup> at pH 7.5 and 6.5, respectively.  
390 For pH 7.5, this represents the minimal value for the correct reproduction of biomass  
391 production. For pH 6.5 we selected a higher value, but noted that the exact value does not  
392 considerably impact the solution. These values allowed for a precise prediction of the biomass  
393 and the production rates of the organic acids. It is necessary to point out that under both pH  
394 conditions, in addition to being glucose limited, the chemostat cultures were also deprived of  
395 glutamine, suggesting that the glutamine content of the CDM-LAB might be limiting and might  
396 thus be insufficient to fulfill the demands in *E. faecalis*  $\Delta$ *glnA*.  
397



398 Predicted flux through the energy metabolism in the  $\Delta glnA$  mutant

399

400 The experimentally measured metabolic and proteomic data were integrated into the  $\Delta glnA$   
401 genome-scale model to simulate the pH shift experiment (as described for the wildtype<sup>18</sup>).

402 Thus, in short, the uptake and release fluxes are set as boundaries for the respective fluxes  
403 and fluxes associated with proteins not present in the proteome data are set to zero, if not  
404 essential. Finally, adjustments of fluxbounds according to de- or increases in expression are  
405 implemented.

406

407 As reflected by the experimental data, the  $\Delta glnA$  mutant has a higher energy demand at all  
408 conditions. This obviously also holds true in the model after the integration of experimental  
409 data. The model shows an increased flux through glycolysis, which implies a higher ATP  
410 production. Accordingly, the predicted flux through lactate dehydrogenase (LDH) is also  
411 increased after the pH shift.

412

413 The flux distribution in glycolysis was compared between wildtype and mutant to investigate  
414 the difference in flux values in energy metabolism. At pH 7.5 a higher flux value passed  
415 through the glycolytic reactions in the mutant as a result of the higher energy demand. In the  
416 model, the higher energy demand in the mutant results from the need to import glutamine  
417 from the extracellular environment either via the GLNabc (glutamine ATP binding cassette)  
418 transporter or via glutamine permease. GLNabc-mediated uptake of glutamine consumes ATP  
419 and permease-mediated uptake imports protons into the cell, which subsequently increases  
420 the ATP demand as ATP is required to pump protons out of the cell. However, glutamine  
421 synthesis from glutamate would of course also consume one ATP per glutamine. Therefore,  
422 the striking difference in energy demand is still not explained. We will come back to this point  
423 below.

424

425 Impact of glutamine uptake in the model of *E. faecalis*  $\Delta glnA$

426

427 As explained above, the fact that the  $\Delta glnA$  mutant is unable to produce glutamine leads to  
428 increased uptake of extracellular glutamine. Based on the chemostat data, glutamine uptake  
429 increased from t1 at pH 7.5 to time point 8 at pH 6.5, corresponding to a 34% increase from  
430  $0.147 \text{ mmol/g}^{-1}_{\text{DWH}^{-1}}$  to  $0.197 \text{ mmol/g}^{-1}_{\text{DWH}^{-1}}$ , respectively. Originally, the glutamine transport

431 via the glutamine ABC transporter (R\_GLNabc) and glutamine permease (R\_GlnT6) were  
432 represented in the model. As proteome data suggested, the ATP binding subunit of the  
433 GLNabc (EF0760) was upregulated after the pH shift, suggesting an increase of the transporter  
434 demand which is consistent with the higher uptake rate of glutamine. Considering the fact  
435 that membrane proteins were often missing from the proteomic data set (due to technical  
436 issues), it is likely that the other subunits of the transporter were subjected to upregulation  
437 as well, as there is an increase in glutamine uptake after the pH shift. However, the original  
438 design of the glutamine transport in the model could not translate the upregulation of GLNabc  
439 into a higher flux. The FBA flux distribution revealed a flux value of zero for GLNabc under both  
440 pH conditions. In order to gain a consistent result between the model and the experimental  
441 data, an improved, new permease reaction was introduced to the model. As reported  
442 previously, the permease system in *E. faecalis* is not amino acid-specific, but is rather shared  
443 between multiple amino acids with various affinities<sup>24</sup>. It is suggested that while glutamine  
444 has the highest affinity to the transporter, the same transporter takes up asparagine and  
445 threonine as well. Hence, to account for the higher affinity of the transporter for glutamine  
446 compared to the other amino acids, the new permease reaction in the model was designed to  
447 carry two glutamines together with one asparagine and one threonine and four protons (one  
448 per each amino acid molecule). The previous amino acid specific permease of all three amino  
449 acids were then deactivated accordingly. The new transport design resulted in a successful  
450 prediction of the uptake rate of all three amino acids and also in using GLNabc when a higher  
451 uptake rate is in demand after the pH shift. The new set up accounts for the actual transport  
452 system in a more accurate way, as it mimics the shared permease system and also gets the  
453 ABC transporter in use when needed. The fact that during glutamine uptake involuntarily and  
454 automatically other amino acids are taken up as well (expending ATP or taking up protons)  
455 might be also at least partially the source for the high energy demand of the mutant. In  
456 addition, and as mentioned above, the regulatory effect of GlnR in *E. faecalis*  $\Delta$ *glnA* might be  
457 disrupted so that the uptake of glutamine (and the other amino acids transported by the same  
458 proteins) is less strictly regulated.

459

460 Predicted flux through glutamine/glutamate metabolism

461

462 The flux distribution of the genome-scale model was subsequently used to analyze the effect  
463 of the pH shift on glutamine-glutamate metabolism. This pathway is of particular interest as  
464 we aimed to uncover the consequences of glutamine auxotrophy in the metabolism of *E.*  
465 *faecalis* in this study. Following an increase in glutamine uptake and on the contrary, decrease  
466 in glutamate uptake, the model predicted an upregulation in the glutamine to glutamate  
467 conversion, which was reflected in switching on the two reactions, aspartyl-tRNA(Asn):L-  
468 glutamine amido-ligase (ADP-forming) (ASNTAL) and carbamoyl-phosphate synthase  
469 (glutamine-hydrolysing) (CBPS). Interestingly, the model predicted a flux shutdown at  
470 glutamine-fructose-6-phosphate (gam6p) transaminase, which produces glucose amine-6-  
471 phosphate by a transaminase reaction between glutamine and fructose-6-phosphate. Instead,  
472 gam6p is produced by assimilating ammonia into fructose-6-phosphate. The model also  
473 predicted an increased flux towards the reverse direction of glutamate dehydrogenase (GDH),  
474 producing glutamate from 2-oxoglutarate. The directionality of GDH plays an important role  
475 in balancing the carbon and nitrogen metabolism<sup>25</sup>. The NADPH/NADP ratio is directly  
476 influenced by less NADPH being available for e.g. amino acid biosynthesis when the flux is  
477 directed towards glutamate production. This also coincides with our observation of a strongly  
478 decreased uptake of glutamate from the medium and an increased uptake of glutamine  
479 (which is required for 2-oxoglutarate production). The decreased level of NADPH also prevents  
480 reductive synthesis reactions from taking place, as it is reflected in the significant  
481 downregulation of proteins involved in e.g. nucleotide metabolism. As another beneficial side  
482 effect, the reverse direction of the GDH consumes one proton. This flux change also leads to  
483 a series of changes in other amino acid production/degradation processes. For instance, a  
484 higher conversion rate of glutamate to alanine and aspartate was predicted, with the former  
485 being excreted by the cell after the pH shift, based on the experimental data.

486

## 487 **Discussion**

488 *E. faecalis* is important in the food industry and hospital environments; therefore,  
489 characterizing its highly adaptive metabolism is necessary. Hence, Integrative analysis of  
490 bacterial metabolism is a key approach to uncover their adaptive behavior. In this study we  
491 analyzed the effect of a decline in environmental pH from 7.5 to 6.5 on a  $\Delta glnA$  mutant of *E.*  
492 *faecalis* and compared the results to those of the wildtype<sup>18</sup>. Like the wildtype, the  $\Delta glnA$   
493 mutant responded to the pH shift by reprogramming its metabolic and proteomic profile to fit

494 the increased energy demand that comes with the need to maintain a higher pH by pumping  
495 protons out of the cell. Many findings therefore paralleled the results from the wildtype  
496 thereby also confirming these. However, there are also striking differences, mostly concerning  
497 the quantity of the energy demand in the genotypes.

498

499 Similar to the wildtype, the mutant decreased biomass production during pH shift since less  
500 ATP is available for anabolic processes. In addition, there is a pronounced shift from mixed  
501 acid to homolactic fermentation. While the qualitative pattern in the mutant resembled the  
502 one in the wildtype, the proportion of lactate production in the mutant was considerably  
503 higher. This confirms that under more energy-demanding conditions (*ΔglnA* mutant or acidic  
504 conditions), *E. faecalis* changes its fermentation profile to homolactic fermentation. While the  
505 stoichiometric analysis of the fermentation pathway shows that mixed acid fermentation  
506 produces one more ATP, it is widely reported that LAB species such as *L. lactis* and *L.*  
507 *plantarum* choose homolactic fermentation during high glycolytic flux, high substrate  
508 availability or faster growth rates<sup>26</sup>. The high uptake rate of glucose under energetically  
509 demanding conditions, which further translates into a higher glycolytic flux, increases the  
510 NADH/NAD ratio. Reportedly, a higher ratio of NADH/NAD upregulates the activity of lactate  
511 dehydrogenase (LDH), e.g. in *L. lactis*<sup>27</sup>. While this has been observed in the literature, a  
512 plausible explanation why the less productive (in terms of ATP) fermentation is favored under  
513 energetically demanding conditions is still missing.

514

515 The amino acid uptake/production profile further underlines the overwhelming influence of  
516 the growing energy demand when pH is lowered. The uptake rate of amino acids mostly  
517 decreased following the pH shift except for arginine, serine and glutamine. A decreased amino  
518 acid uptake should be a result of regulation when less biomass is produced, and also saves  
519 energy, since the uptake is either coupled to even more proton uptake or to ATP hydrolysis.  
520 The increased uptake of arginine and serine can be easily explained since these can be directly  
521 used for ATP production. Arginine is considered a prolific energy resource in many lactic acid  
522 bacteria, especially those important in the food industry<sup>28,29</sup>. An interesting aspect of arginine  
523 catabolism in lactic acid bacteria (when used for energy production) is that it often does not  
524 result in citrulline production, regardless of using arginine deaminase or not<sup>28,29</sup>. Likewise, our  
525 data suggested that an increase in arginine uptake following the pH shift leads to an increase

526 in ornithine, but not citrulline production. The previous finding on the production of ornithine  
527 from citrulline through ornithine carbamoyl transferase in *E. faecalis*<sup>30</sup> was supported by the  
528 flux distribution in the genome-scale model. Ornithine is then used by the arginine-ornithine  
529 antiporter to import even more arginine into the cell.

530

531 Not surprisingly, there is quite a big difference between wildtype and mutant in  
532 glutamine/glutamate metabolism and how this is affected by the pH shift. While the uptake  
533 rate of glutamate considerably decreased in response to pH shift, the glutamine uptake rate  
534 was increased – in the wildtype only very slightly and strongly in the mutant. As discussed  
535 above, several mechanisms might contribute to this observation – first, we proposed in  
536 accordance with literature on *S. pneumoniae*<sup>23</sup> that the regulatory effect of the transcription  
537 factor GlnR on the uptake of glutamine depends on the intact gene for GlnA and its absence  
538 results in an unregulated glutamine uptake. Second, the reversal of the flux of the GDH with  
539 its regulatory consequences is only possible, if more 2-oxoglutarate is produced for which  
540 glutamine is needed. Third, as learned from the genome-scale model, it is important to  
541 consider the lack of specificity of the amino acid uptake mechanisms. Co-transported with e.g.  
542 glutamate are amino acids like aspartate that cannot readily be catabolized for energy  
543 production. In the case of glutamine, at least small amounts of arginine are also co-  
544 transported which is favorable under high energy demand.

545

546 The glutamine synthetase reaction (catalyzed by GlnA) is the main reaction to assimilate  
547 ammonium<sup>17</sup>. However, here glutamine is imported in such large quantities that some of it  
548 has to be deaminated to produce glutamate (so that even a small amount of excretion is  
549 observed) and ammonium which the model also predicted. Although high concentrations of  
550 ammonium are reported to lower the growth rate in bacteria, the underlying reason is  
551 suggested to be the general osmotic or ionic effect of ammonium rather than its toxicity<sup>31</sup>.  
552 The exact mechanism of ammonium export is not known, but likely either ask for proton  
553 antiport or ATP which adds to the energy demand of the mutant.

554

555 The analysis of the proteome data again showed a lot of parallel adjustments to pH shift  
556 between wildtype and mutant. Here, the decrease of expression in enzymes of the *de novo*  
557 biosynthesis of nucleotides which is costly, and also the upregulation of enzymes involved in

558 the restructuring of the cell membrane and cell wall which is necessary while facing a drop in  
559 extracellular pH level in order to decrease proton leak is common between the genotypes. The  
560 mutant however shows a striking lack of increasing the protein expression of glycolytic  
561 enzymes at the beginning of the pH shift experiment. Since there is already a high glycolytic  
562 flux in the mutant at the start of the experiment, we assume that the respective changes in  
563 core metabolism already happened at this point.

564

565 All experimental data were reproducible in the genome-scale model. However, the  
566 stoichiometry of amino acid uptake reactions had to be adjusted to a realistic depiction of  
567 their non-specificity. To the best of our knowledge, this has not considered in other genome-  
568 scale models of bacteria so far.

569

570 Initially, when considering all of the above findings which mostly reflect the higher need for  
571 energy in the mutant, it was not obvious why this higher need arises. Glutamine is the primary  
572 nitrogen donor in bacterial cells. High levels of glutamine have to be maintained in order to  
573 allow effective transfer of amino-groups<sup>32</sup>. This can be accomplished by its synthesis and  
574 uptake in the wildtype or its uptake alone in the mutant. At first glance the energetic cost of  
575 glutamine uptake is comparable compared to its biosynthesis via GlnA. One ATP is needed for  
576 GlnA and the usage of one ATP or proton import is the consequence of glutamine import.  
577 However, if the control over glutamine uptake is inhibited due to the lack of GlnA, the  
578 potentially uncontrolled and excessive import of glutamine may incur additional cost to the  
579 cells. Thus, both the automatic co-transport of unwanted amino acids, as well as the need to  
580 excrete large amounts of ammonia are certainly costly.

581

#### 582 **Acknowledgements:**

583 SBL would like to thank the HGS Mathcomp and the Graduate academy at Heidelberg  
584 University for financial support. NV and TF thank the DFG (grant numbers VE1075/2-1 and FI  
585 1588/ 2-1) for funding. Ben C Collins and Olga T Schubert, the co-authors of Großholz *et al*  
586 are acknowledged for proteomics analysis.

587

588 1. F., H. J. *et al*. Enterococcus faecalis 6-Phosphogluconolactonase Is Required for Both  
589 Commensal and Pathogenic Interactions with *Manduca sexta*. *Infect. Immun.* **83**, 396–

- 590 404 (2015).
- 591 2. Hancock, L. E., Murray, B. E. & Sillanpää, J. Enterococci: From Commensals to Leading  
592 Causes of Drug Resistant Infection. *Enterococcal Cell Wall Components Struct.* 1–35  
593 (2014).
- 594 3. Jabbari Shiadeh, S. M., Pormohammad, A., Hashemi, A. & Lak, P. Global prevalence of  
595 antibiotic resistance in blood-isolated Enterococcus faecalis and Enterococcus  
596 faecium: a systematic review and meta-analysis. *Infect. Drug Resist.* **12**, 2713–2725  
597 (2019).
- 598 4. Asadollahi, P., Razavi, S., Asadollahi, K., Pourshafie, M. R. & Talebi, M. Rise of  
599 antibiotic resistance in clinical enterococcal isolates during 2001–2016 in Iran: a  
600 review. *New microbes new Infect.* **26**, 92–99 (2018).
- 601 5. L., K. A. *et al.* Enterococcus faecalis Tropism for the Kidneys in the Urinary Tract of  
602 C57BL/6J Mice. *Infect. Immun.* **73**, 2461–2468 (2005).
- 603 6. Dahlberg, A. C. & Kosikowsky, F. V. The Development of Flavor in American Cheddar  
604 Cheese Made from Pasteurized Milk with *Streptococcus Faecalis* Starter<sup>1</sup>.  
605 *J. Dairy Sci.* **31**, 275–284 (1948).
- 606 7. Fuller, R. Probiotics in man and animals. *J. Appl. Bacteriol.* **66**, 365–378 (1989).
- 607 8. Baccouri, O. *et al.* Probiotic Potential and Safety Evaluation of Enterococcus faecalis  
608 OB14 and OB15, Isolated From Traditional Tunisian Testouri Cheese and Rigouta,  
609 Using Physiological and Genomic Analysis. *Front. Microbiol.* **10**, 881 (2019).
- 610 9. Penkler, G. *et al.* Construction and validation of a detailed kinetic model of glycolysis  
611 in Plasmodium falciparum. *FEBS J.* **282**, 1481–1511 (2015).
- 612 10. Oberhardt, M. A., Palsson, B. Ø. & Papin, J. A. Applications of genome-scale metabolic  
613 reconstructions. *Mol. Syst. Biol.* **5**, 320 (2009).
- 614 11. Orth, J. D., Thiele, I. & Palsson, B. Ø. What is flux balance analysis? *Nat. Biotechnol.* **28**,  
615 245 (2010).
- 616 12. Bernstein, D. B., Sulheim, S., Almaas, E. & Segrè, D. Addressing uncertainty in genome-  
617 scale metabolic model reconstruction and analysis. *Genome Biol.* **22**, 64 (2021).
- 618 13. Levering, J. *et al.* Genome-scale reconstruction of the Streptococcus pyogenes M49  
619 metabolic network reveals growth requirements and indicates potential drug targets.  
620 *J. Biotechnol.* **232**, 25–37 (2016).
- 621 14. Granata, I., Troiano, E., Sangiovanni, M. & Guarracino, M. R. Integration of

- 622 transcriptomic data in a genome-scale metabolic model to investigate the link  
623 between obesity and breast cancer. *BMC Bioinformatics* **20**, 162 (2019).
- 624 15. Tian, M. & Reed, J. L. Integrating proteomic or transcriptomic data into metabolic  
625 models using linear bound flux balance analysis. *Bioinformatics* **34**, 3882–3888 (2018).
- 626 16. Reed, J. L. Shrinking the Metabolic Solution Space Using Experimental Datasets. *PLOS*  
627 *Comput. Biol.* **8**, e1002662 (2012).
- 628 17. Forchhammer, K. Glutamine signalling in bacteria. *Front. Biosci.* **12**, 358–370 (2007).
- 629 18. Großholz, R. *et al.* Integrating highly quantitative proteomics and genome-scale  
630 metabolic modeling to study pH adaptation in the human pathogen *Enterococcus*  
631 *faecalis*. *Npj Syst. Biol. Appl.* **2**, 16017 (2016).
- 632 19. Veith, N. *et al.* Using a Genome-Scale Metabolic Model of *Enterococcus faecalis* V583  
633 To Assess Amino Acid Uptake and Its Impact on Central Metabolism. *Appl. Environ.*  
634 *Microbiol.* **81**, 1622 LP – 1633 (2015).
- 635 20. Teusink, B. *et al.* Analysis of Growth of *Lactobacillus plantarum* WCFS1 on a Complex  
636 Medium Using a Genome-scale Metabolic Model\*. *J. Biol. Chem.* **281**, 40041–40048  
637 (2006).
- 638 21. Mahadevan, R. & Schilling, C. H. The effects of alternate optimal solutions in  
639 constraint-based genome-scale metabolic models. *Metab. Eng.* **5**, 264–276 (2003).
- 640 22. Casiano-Colon, A. & Marquis, R. E. Role of the arginine deiminase system in protecting  
641 oral bacteria and an enzymatic basis for acid tolerance. *Appl. Environ. Microbiol.* **54**,  
642 1318–1324 (1988).
- 643 23. Kloosterman, T. G. *et al.* Regulation of Glutamine and Glutamate Metabolism by GlnR  
644 and GlnA in *Streptococcus pneumoniae*\*. *J. Biol. Chem.* **281**, 25097–25109 (2006).
- 645 24. Holden, J. T. & Bunch, J. M. Asparagine transport in *Lactobacillus plantarum* and  
646 *Streptococcus faecalis*. *Biochim. Biophys. Acta - Biomembr.* **307**, 640–655 (1973).
- 647 25. Smith EL, Austen BM, B. K. & N. J. Glutamate dehydrogenases. *Enzym.* **11**. (pp 29,  
648 (1975).
- 649 26. Teusink, B., Bachmann, H. & Molenaar, D. Systems biology of lactic acid bacteria: a  
650 critical review. *Microb. Cell Fact.* **10**, S11 (2011).
- 651 27. Garrigues, C., Loubiere, P., Lindley, N. D. & Cocaign-Bousquet, M. Control of the shift  
652 from homolactic acid to mixed-acid fermentation in *Lactococcus lactis*: predominant  
653 role of the NADH/NAD<sup>+</sup> ratio. *J. Bacteriol.* **179**, 5282–5287 (1997).



- 654 28. Hwang, H. & Lee, J.-H. Characterization of Arginine Catabolism by Lactic Acid Bacteria  
655 Isolated from Kimchi. *Molecules* **23**, 3049 (2018).
- 656 29. Tonon, T. & Lonvaud-Funel, A. Metabolism of arginine and its positive effect on  
657 growth and revival of *Oenococcus oeni*. *J. Appl. Microbiol.* **89**, 526–531 (2000).
- 658 30. Knivett, V. A. The anaerobic interconversion of ornithine and citrulline by  
659 *Streptococcus faecalis*. *Biochem. J.* **58**, 480–486 (1954).
- 660 31. Müller, T., Walter, B., Wirtz, A. & Burkovski, A. Ammonium Toxicity in Bacteria. *Curr.*  
661 *Microbiol.* **52**, 400–406 (2006).
- 662 32. Reitzer, L. B. T.-R. M. in *B. S. Amino Acid Synthesis* ☆. in (Elsevier, 2014).  
663 doi:<https://doi.org/10.1016/B978-0-12-801238-3.02427-2>
- 664
